# Supplementary material for: Characterization and Modeling of Reversible Antibody Self-Association Provide Insights into Behavior, Prediction, and Correction
Source: PubMed Central journal article supplement (PMC7931086; doi:10.3390/antib10010008), 2021-02-15
Supplement: antibodies-10-00008-s001.pdf [file antibodies-10-00008-s001.pdf]

| Variant      | SE-UPLC  |          |
|--------------|----------|----------|
|              | RT (min) | % Purity |
| <b>F104</b>  | 2.34     | 98.1     |
| <b>F104W</b> | 2.48     | 92.7     |
| <b>F104I</b> | 2.47     | 97.7     |
| <b>F104H</b> | 2.46     | 98.3     |
| <b>F104D</b> | 2.39     | 98.5     |
| <b>F104K</b> | 2.46     | 98.1     |
| <b>F104E</b> | 2.43     | 89.2     |
| <b>F104S</b> | 2.45     | 89.7     |
| <b>F104G</b> | 2.40     | 91.1     |
| <b>F104R</b> | 2.43     | 91.5     |
| <b>Y30R</b>  | 2.37     | 93.1     |
| <b>Y30H</b>  | 2.29     | 93.8     |
| <b>Y30N</b>  | 2.33     | 86.3     |
| <b>Y30D</b>  | 2.37     | 94.9     |
| <b>Y30Q</b>  | 2.31     | 93.0     |
| <b>Y30G</b>  | 2.26     | 93.6     |
| <b>F92W</b>  | 2.45     | 90.2     |
| <b>F92H</b>  | 2.39     | 90.5     |
| <b>F92V</b>  | 2.39     | 90.3     |
| <b>F92R</b>  | 2.40     | 92.2     |
| <b>F92S</b>  | 2.37     | 89.7     |
| <b>F92G</b>  | 2.35     | 90.0     |

**Table S1.** SE-UPLC retention times (RT) and % purity tabulated for each variant.

| Variant      | $D_0$ (cm <sup>2</sup> /s) | $R_h$ values (nm) |         |         |         |         |          | $\Delta$ AC-SINS |
|--------------|----------------------------|-------------------|---------|---------|---------|---------|----------|------------------|
|              |                            | 1 mg/mL           | 2 mg/mL | 4 mg/mL | 6 mg/mL | 8 mg/mL | 10 mg/mL |                  |
| <b>F104</b>  | 2.51E-07                   | 8.9               | 12.1    | 13.0    | 14.0    | 15.3    | 16.2     | 29               |
| <b>F104W</b> | 3.87E-07                   | 6.3               | 6.8     | 6.9     | 7.0     | 7.3     | 7.4      | 16               |
| <b>F104I</b> | 3.78E-07                   | 6.5               | 7.2     | 7.9     | 8.6     | 9.5     | 9.9      | 25               |
| <b>F104H</b> | 3.35E-07                   | 7.1               | 8.3     | 9.2     | 9.9     | 10.7    | 11.3     | 27               |
| <b>F104D</b> | 4.60E-07                   | 5.4               | 5.5     | 5.6     | 5.8     | 5.9     | 6.0      | 12               |
| <b>F104K</b> | 4.56E-07                   | 5.5               | 5.5     | 5.5     | 5.6     | 5.6     | 5.7      | 6                |
| <b>F104E</b> | 4.39E-07                   | 5.6               | 5.9     | 6.1     | 6.3     | 6.6     | 6.8      | 19               |
| <b>F104S</b> | 3.96E-07                   | 6.2               | 6.6     | 7.0     | 7.0     | 7.3     | 7.8      | 22               |
| <b>F104G</b> | 3.09E-07                   | 7.6               | 9.2     | 10.1    | 11.3    | 11.9    | 12.8     | 27               |
| <b>F104R</b> | 4.17E-07                   | 5.9               | 6.1     | 6.2     | 6.3     | 6.4     | 6.8      | 16               |
| <b>Y30R</b>  | 4.20E-07                   | 5.9               | 6.2     | 6.5     | 6.6     | 6.8     | 6.8      | 17               |
| <b>Y30H</b>  | 2.43E-07                   | 10.8              | 11.2    | 12.7    | NA      | NA      | NA       | 30               |
| <b>Y30N</b>  | 3.32E-07                   | 7.8               | 8.0     | 8.9     | NA      | NA      | NA       | 30               |
| <b>Y30D</b>  | 4.20E-07                   | 5.9               | 6.0     | 6.0     | 6.3     | 6.3     | 6.3      | 5                |
| <b>Y30Q</b>  | 3.48E-07                   | 7.5               | 8.1     | 9.3     | NA      | NA      | NA       | 28               |
| <b>Y30G</b>  | 3.08E-07                   | 7.5               | 9.3     | 10.5    | 11.9    | 12.2    | 12.7     | 29               |
| <b>F92W</b>  | 2.87E-07                   | 8.2               | 10.3    | 10.2    | 11.4    | 12.3    | 13.2     | 29               |
| <b>F92H</b>  | 3.96E-07                   | 6.2               | 6.7     | 6.9     | 7.1     | 7.5     | 7.8      | 25               |
| <b>F92V</b>  | 4.00E-07                   | 6.1               | 6.6     | 6.9     | 7.1     | 7.5     | 7.8      | 21               |
| <b>F92R</b>  | 4.22E-07                   | 5.9               | 6.0     | 6.1     | 6.3     | 6.4     | 6.6      | 16               |
| <b>F92S</b>  | 3.28E-07                   | 7.2               | 8.4     | 9.1     | 9.3     | 10.1    | 10.6     | 28               |
| <b>F92G</b>  | 3.24E-07                   | 7.3               | 8.5     | 9.2     | 9.5     | 10.1    | 10.7     | 28               |

**Table S2.** Tabulated diffusional coefficients ( $D_0$ ), hydrodynamic radii ( $R_h$ ) measured over the range of 1-10 mg/mL, and  $\Delta$ AC-SINS values (in nm) for all variants evaluated. "NA" denotes not measured or available.
